# Supplementary material for: Responses of the Pine Island and Thwaites glaciers to melt and sliding parameterizations
Source: Copernicus journal article supplement (doi:10.5194/tc-18-2583-2024), 2024-05-28
Supplement: Supplementary file 1 [file tc-18-2583-2024-supplement.pdf]

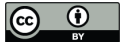

*Supplement of*

## **Responses of the Pine Island and Thwaites glaciers to melt and sliding parameterizations**

**Ian Joughin et al.**

*Correspondence to:* Ian Joughin (irj@uw.edu)

The copyright of individual parts of the supplement might differ from the article licence.

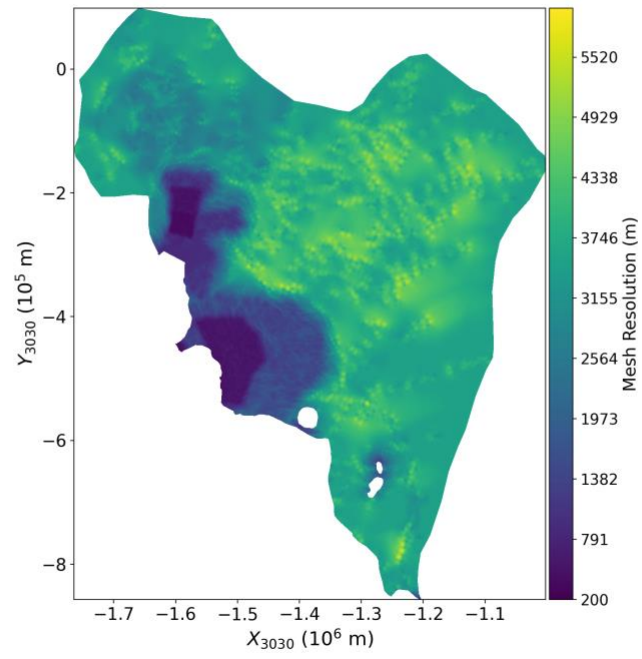

Figure S1. Mesh resolution for the domain that includes Pine Island and Thwaites glaciers.

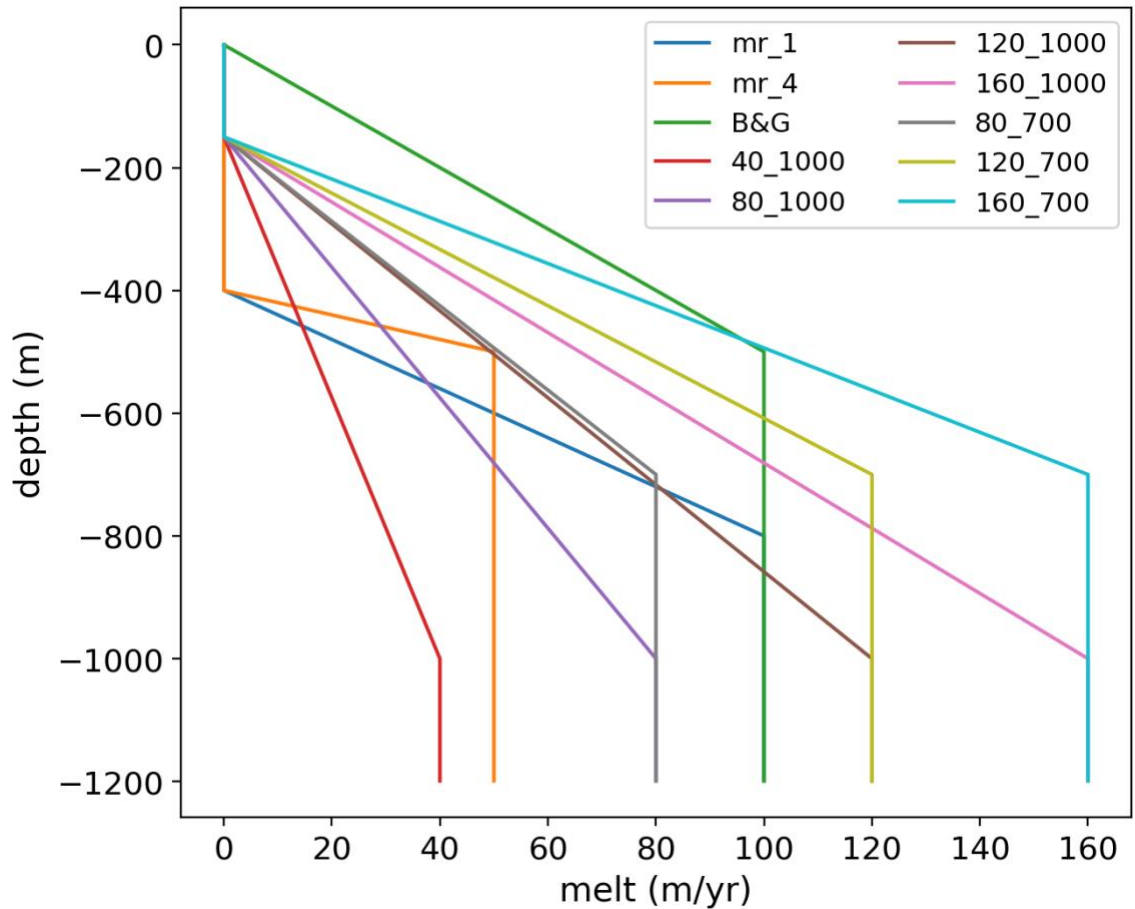

Figure S2. Depth-parameterized melt profiles with mr\_1 and mr\_4 from Gudmundsson et al., (2023), B&G from Barnes and Gudmundsson (2022), and 40\_1000, 80\_1000, 120\_1000, 160\_1000, 80\_700, 120\_700, and 160\_700 from Yu et al., (2018).

## References

Barnes, J. M. and Gudmundsson, G. H.: The predictive power of ice sheet models and the regional sensitivity of ice loss to basal sliding parameterisations: a case study of Pine Island and Thwaites glaciers, West Antarctica, *Cryosphere*, 16, 4291–4304, <https://doi.org/10.5194/tc-16-4291-2022>, 2022.

Gudmundsson, G. H., Barnes, J. M., Goldberg, D. N., and Morlighem, M.: Limited Impact of Thwaites Ice Shelf on Future Ice Loss From Antarctica, *Geophys. Res. Lett.*, 50, <https://doi.org/10.1029/2023gl102880>, 2023.

Yu, H., Rignot, E., Seroussi, H., and Morlighem, M.: Retreat of Thwaites Glacier, West Antarctica, over the next 100 years using various ice flow models, ice shelf melt scenarios and basal friction laws, *The Cryosphere*, 12, 3861–3876, <https://doi.org/10.5194/tc-12-3861-2018>, 2018.
